# Supplementary material
Source: publisher site journal article supplement (https://www.dovepress.com/article/376069)
Supplement: Supplementary file 1 [file get_supplementary_file.php]

**Questions of the survey**

1. Gender:

- Male
- Female

1. Year of study:

- 2nd
- 3rd
- 4th
- 5th
- 6th
- Interns

1. Cumulative GPA:

- 4.5 – 5
- 4 – 4.49
- 3.5 – 3.99
- 3 – 3.49
- 2.5 – 2.99
- Less than 2.5

1. Blackboard experience before COVID-19 pandemic:

- Less than average (download materials)
- Average (used to submit assignments, take exams, download materials)
- More than average (attend virtual classrooms, discussion, submit assignment, take exams, download materials)
- Never used blackboard

1. Please report your agreement with:

1. Accessibility:

| Strongly Disagree | Disagree | Neutral | Agree | Strongly Agree |  |
| --- | --- | --- | --- | --- | --- |
|  |  |  |  |  | 1. You have a computer that you can use at home |
|  |  |  |  |  | 1. Your environment at home was helpful for e-learning |
|  |  |  |  |  | 1. Internet connectivity was good (you were able to attend lectures, exams and submit assignments) |
|  |  |  |  |  | 1. The online platform (blackboard) was easy to use |

2. Quality of the e-learning:

| Strongly Disagree | Disagree | Neutral | Agree | Strongly Agree |  |
| --- | --- | --- | --- | --- | --- |
|  |  |  |  |  | 1. E-learning allowed excellent interaction with the instructors |
|  |  |  |  |  | 1. E-learning allows equal chances to students in online assessments and exams |
|  |  |  |  |  | 1. E-learning improved the standardization of the lectures between males and females (lectures were pre-recoded) |
|  |  |  |  |  | 1. Procedural videos (demos) were more useful than live demonstration during lab sessions |

3. Self-reflection:

| Strongly Disagree | Disagree | Neutral | Agree | Strongly Agree |  |
| --- | --- | --- | --- | --- | --- |
|  |  |  |  |  | 1. You gained a decent amount of knowledge from e-learning |
|  |  |  |  |  | 1. Materials posted on blackboard prior to the lecture encouraged you to read and prepare for the lecture |
|  |  |  |  |  | 1. Online lectures encouraged you to attend classes |

4. Overall experience:

| Strongly Disagree | Disagree | Neutral | Agree | Strongly Agree |  |
| --- | --- | --- | --- | --- | --- |
|  |  |  |  |  | 1. Online classes are convenient |
|  |  |  |  |  | 1. You prefer integrating e-learning with traditional learning (classroom) in the future |
|  |  |  |  |  | 1. You recommend e-learning in non-clinical subjects |
|  |  |  |  |  | 1. You recommend e-learning in clinical subjects |
|  |  |  |  |  | 1. Online lectures need more improvement |

1. What mode of learning do you prefer?
2. Traditional learning
3. E-learning
4. Integrating both
5. No preferences
6. How do you rate your overall experience with e-learning from 1-5 (1 is poor - 5 is excellent)?

| 1 | 2 | 3 | 4 | 5 |
| --- | --- | --- | --- | --- |

Poor

Excellent
